# Supplementary material for: The role of crystallization and phase separation in the formation of physically cross-linked PVA hydrogels
Source: Royal Society of Chemistry journal article supplement (doi:10.1039/c2sm26763b), 2012-11-12
Supplement: c2sm26763b.pdf [file c2sm26763b.pdf]

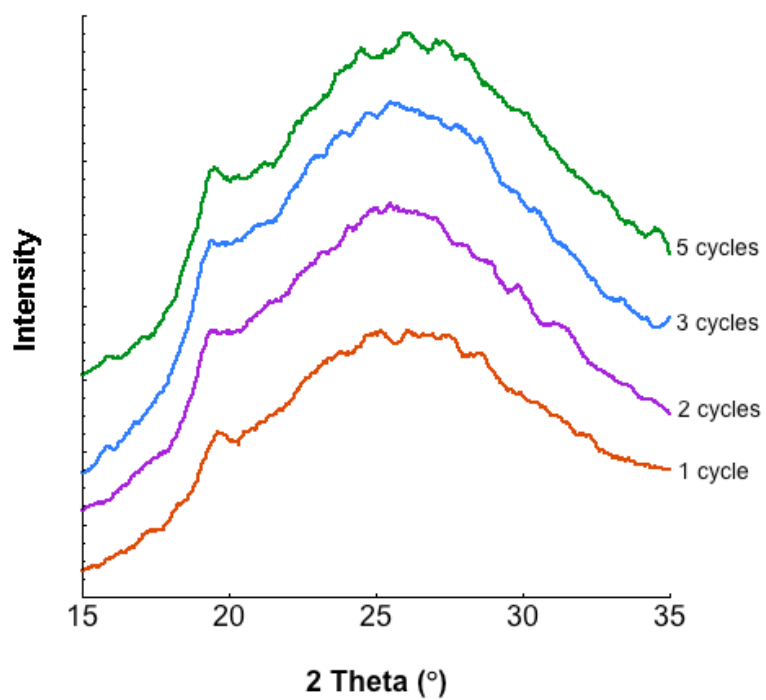

5

**Figure 1S.** Typical wide-angle X-ray diffraction spectra for 30 wt% freeze-thawed PVA hydrogels with increasing freeze-thaw cycles.

10

15

20

25

30

35

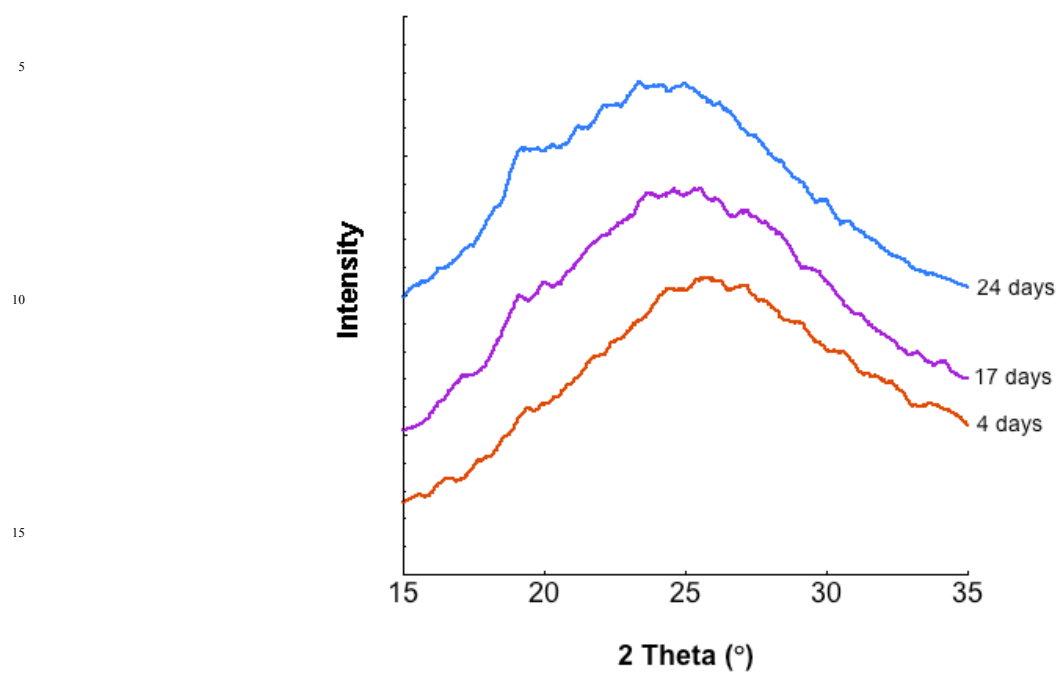

**Figure 2S.** Typical wide-angle X-ray diffraction spectra for 30 wt% aged PVA hydrogels with increasing aging time.

**Table 1S.** Average compressive modulus, tensile modulus, crystallinity, and porosity for freeze-thawed and aged PVA hydrogels as a function of polymer concentration.

|                                | <b>Compressive Modulus (MPa)<sup>a</sup></b> | <b>Crystallinity (%)<sup>b</sup></b> | <b>Porosity (%)<sup>a</sup></b> |
|--------------------------------|----------------------------------------------|--------------------------------------|---------------------------------|
| <b>Freeze-Thawed Hydrogels</b> |                                              |                                      |                                 |
| 10% PVA                        | 0.070 ± 0.008                                | 0.36 ± 0.12                          | 45.1 ± 5.4                      |
| 20% PVA                        | 0.241 ± 0.010                                | 1.48 ± 0.23                          | 44.8 ± 3.3                      |
| 30% PVA                        | 0.678 ± 0.030                                | 3.59 ± 0.36                          | 36.4 ± 5.3                      |
| 35% PVA                        | 0.801 ± 0.040                                | 5.20 ± 0.43                          | 36.2 ± 3.6                      |
| <b>Aged Hydrogels</b>          |                                              |                                      |                                 |
| 30% PVA                        | 0.343 ± 0.097                                | 2.35 ± 0.38                          | 1.3 ± 0.7                       |
| 35% PVA                        | 0.408 ± 0.072                                | 3.80 ± 1.80                          | 2.2 ± 1.3                       |

<sup>a</sup> Values are after 6 cycles for freeze-thawed hydrogels and 31 days for aged gels

<sup>b</sup> Values are after 3 cycles for freeze-thawed hydrogels and 31 days for aged gels
